# Supplementary material for: Role of zinc oxide and carbonaceous nanomaterials in non-fullerene-based polymer bulk heterojunction solar cells for improved cost-to-performance ratio
Source: Royal Society of Chemistry journal article supplement (doi:10.1039/c5ta06802a), 2015-01-01
Supplement: c5ta06802a1.pdf [file c5ta06802a1.pdf]

## Role of Zinc Oxide and Carbonaceous Nanomaterials in Non-Fullerene Based Polymer Bulk Heterojunction Solar Cells for Improved Cost-to-Performance Ratio

Rajni Sharma<sup>1</sup>, Firoz Alam<sup>2</sup>, A. K. Sharma<sup>3</sup>, V.Dutta<sup>2</sup>, S.K.Dhawan<sup>1</sup>

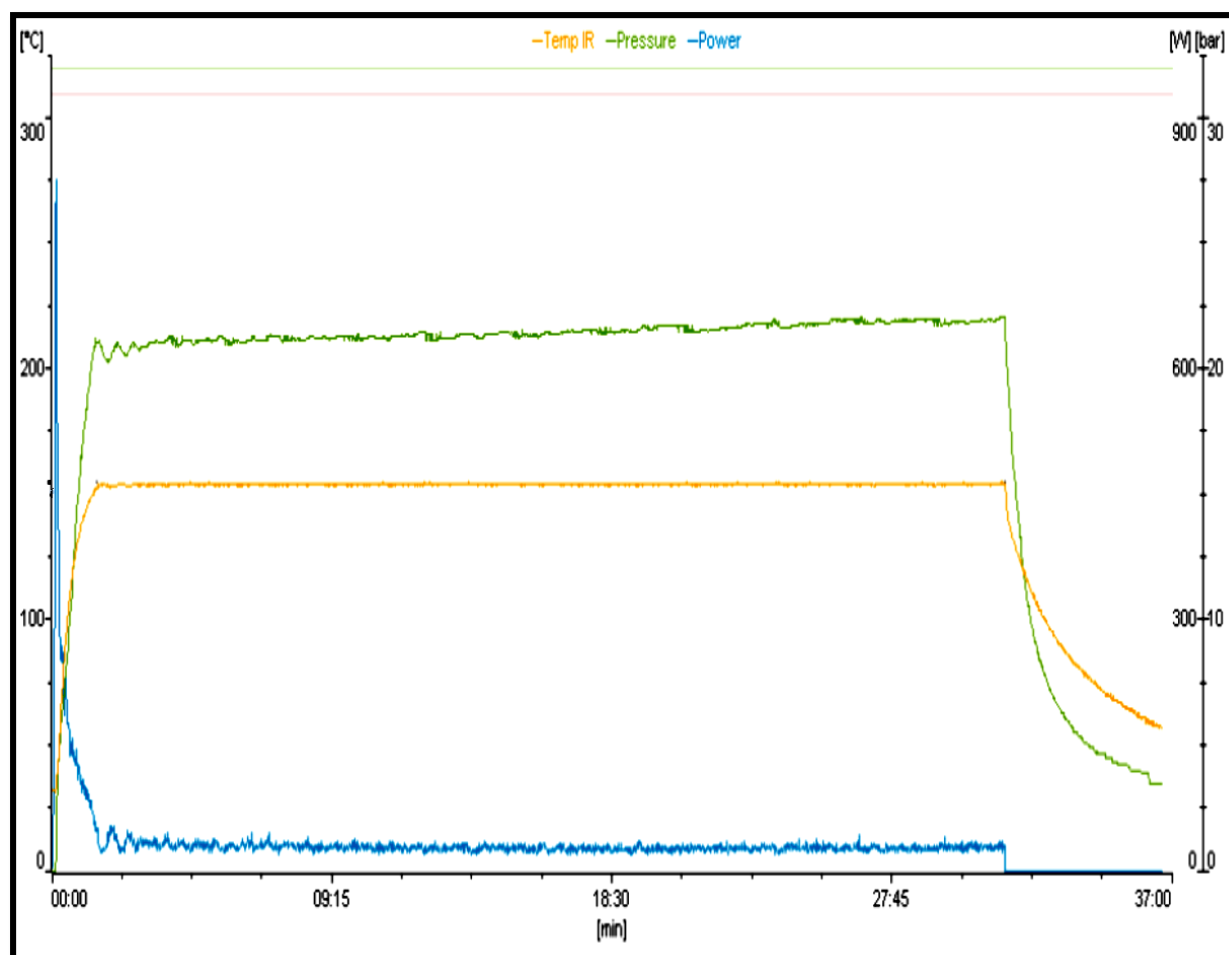

S1: Microwave assisted hydrothermal reaction showing variation of pressure, power and temperature during Z@C<sub>dots</sub> synthesis.

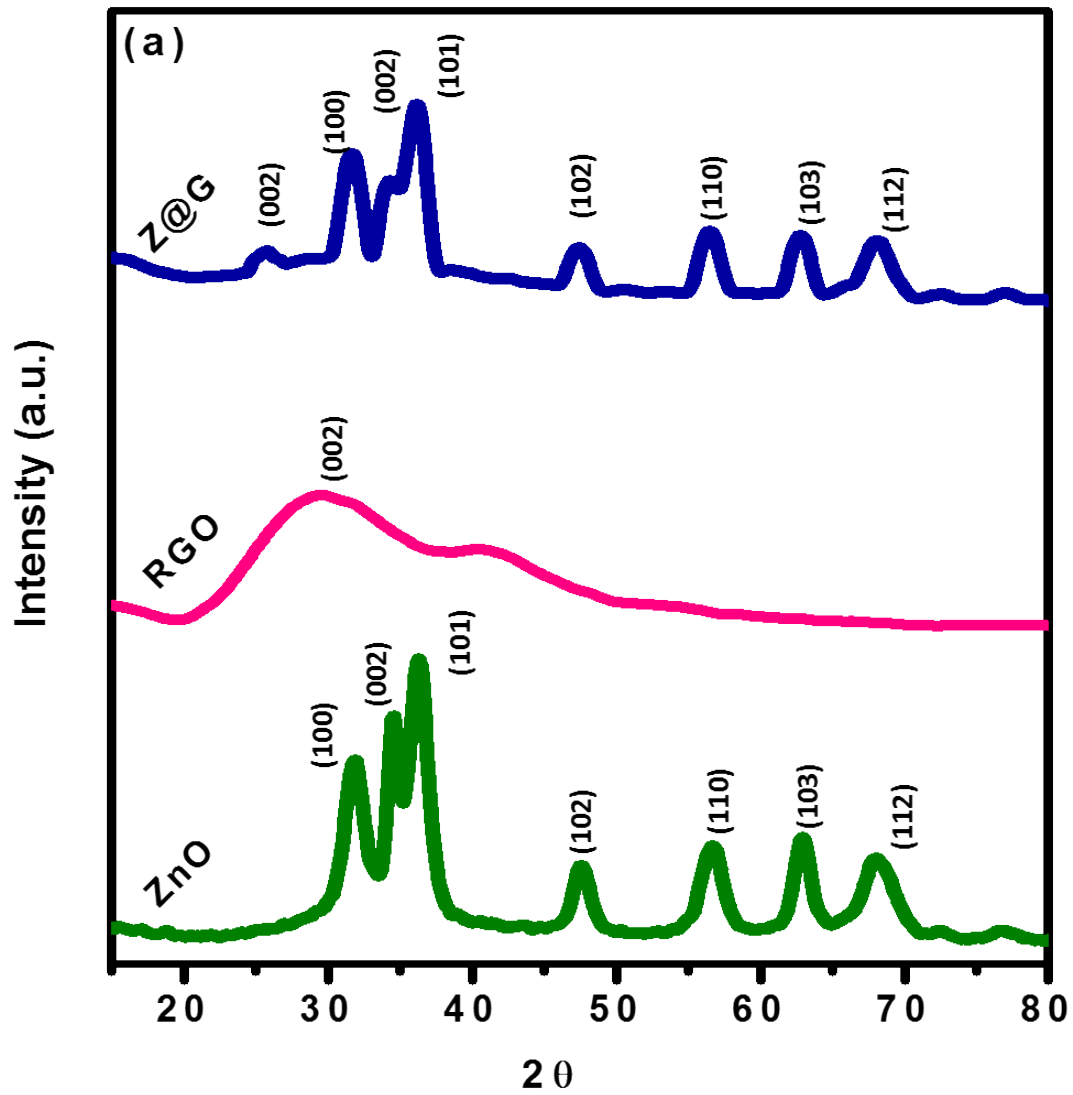

S2: XRD of procured RGO, as synthesized ZnO nanoparticles and ZnO/C-dots nanocomposite (Z@C<sub>dots</sub>) describing phases and crystallinity.

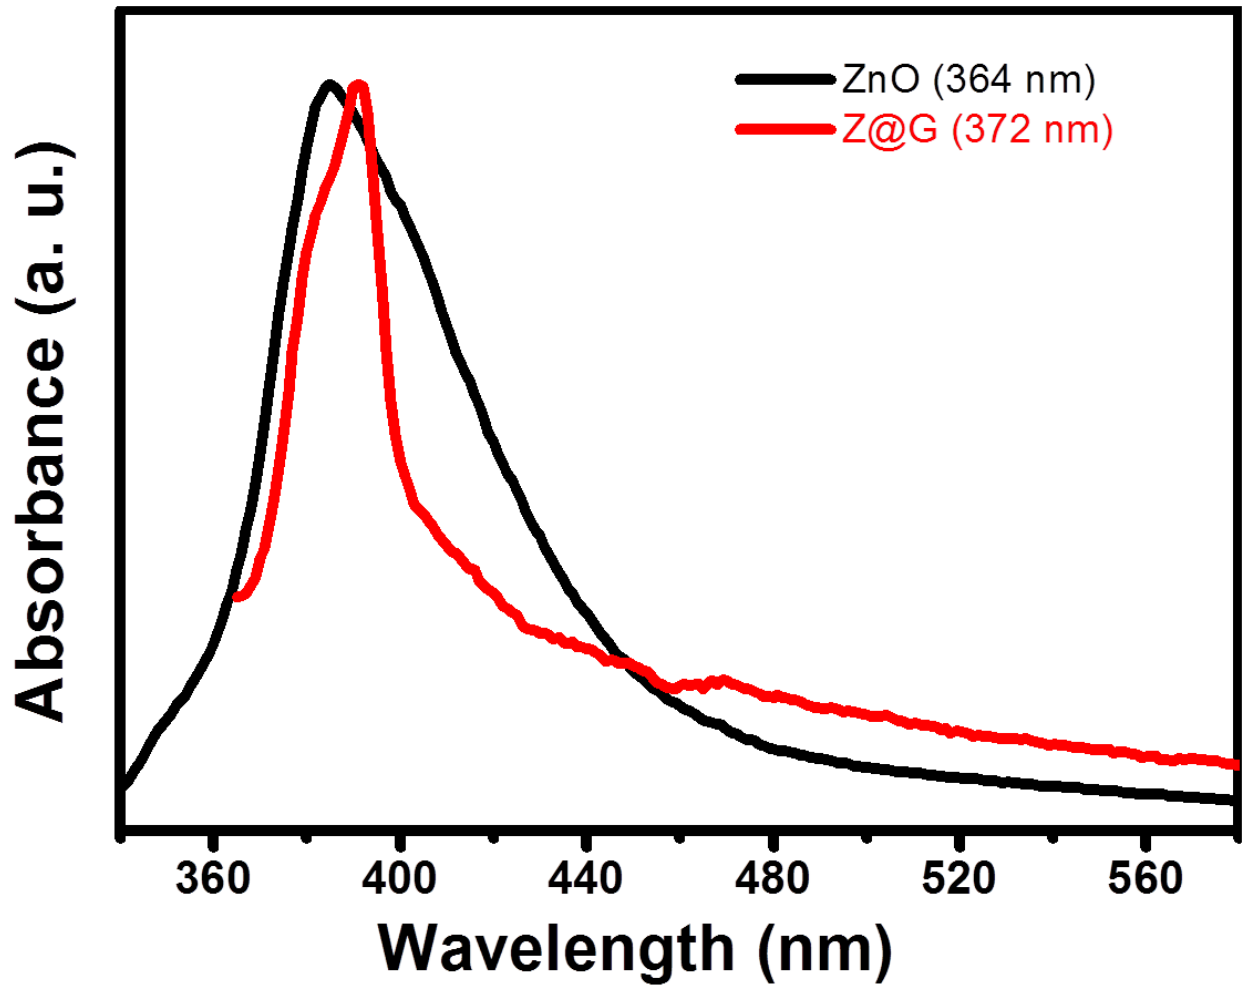

S3: UV-Vis spectra of as synthesized ZnO and Z@G nanocomposite; with absorption peak at 364 nm and 372 nm, demonstrating the shift in spectrum of nanocomposite

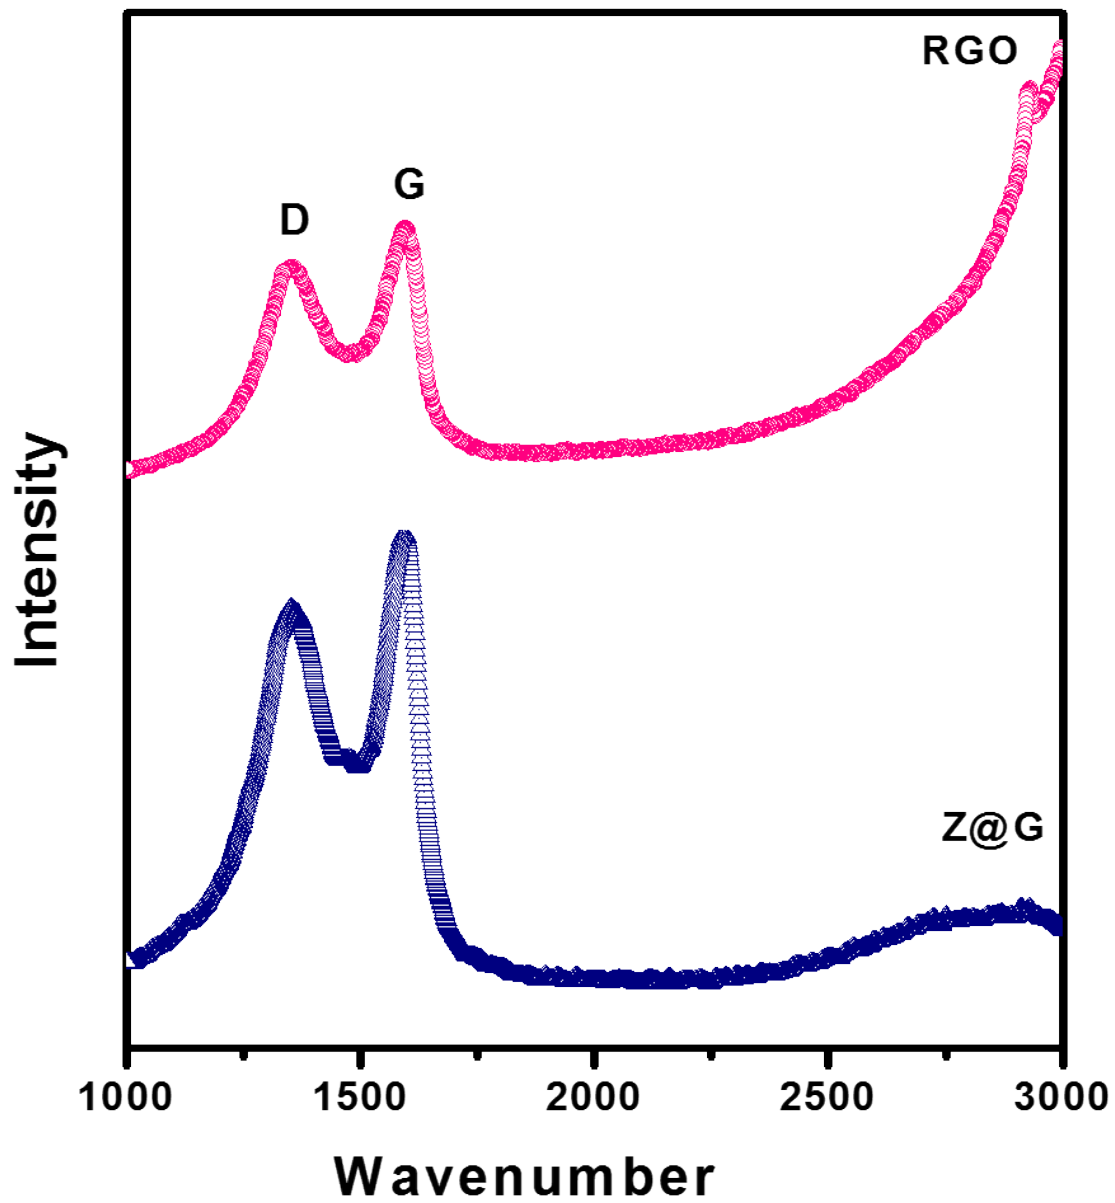

S4: Raman spectra of RGO and Z@G nanocomposite; showing changes in D and G band.

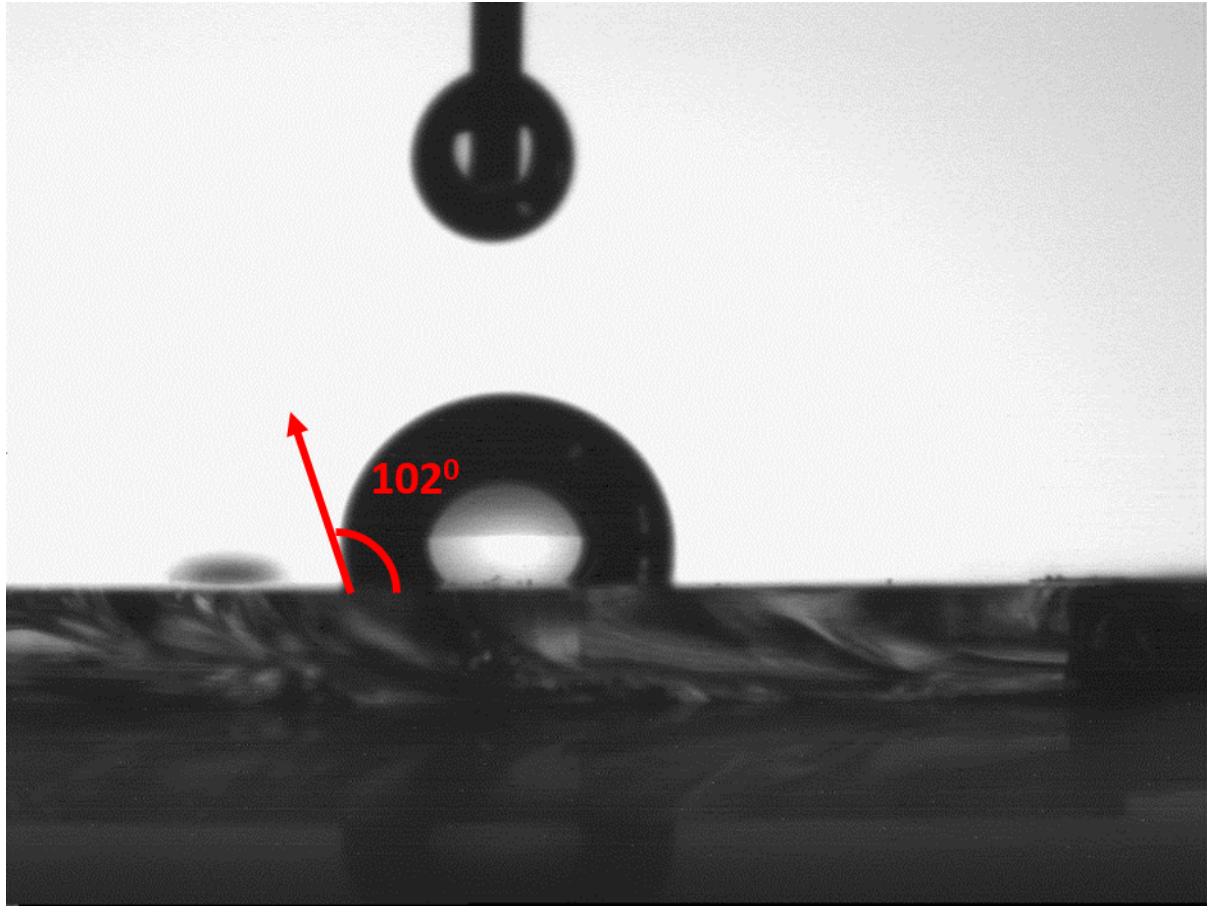

S5: Contact angle measurement of Z@C<sub>dots</sub> nanocomposite; with contact angle higher than 90° (showing hydrophobic nature of Z@C<sub>dots</sub>)
